# Supplementary material for: Burden of mortality from hepatocellular carcinoma and biliary tract cancers by race and ethnicity and sex in US, 2018–2023
Source: PubMed Central journal article supplement — Clin Mol Hepatol. 2024 Jun 24;30(4):756–70. doi: 10.3350/cmh.2024.0318 (PMC11540356; doi:10.3350/cmh.2024.0318), 2024-06-24
Supplement: cmh-2024-0318-Supplementary-Fig-1.pdf [file cmh-2024-0318-Supplementary-Fig-1.pdf]

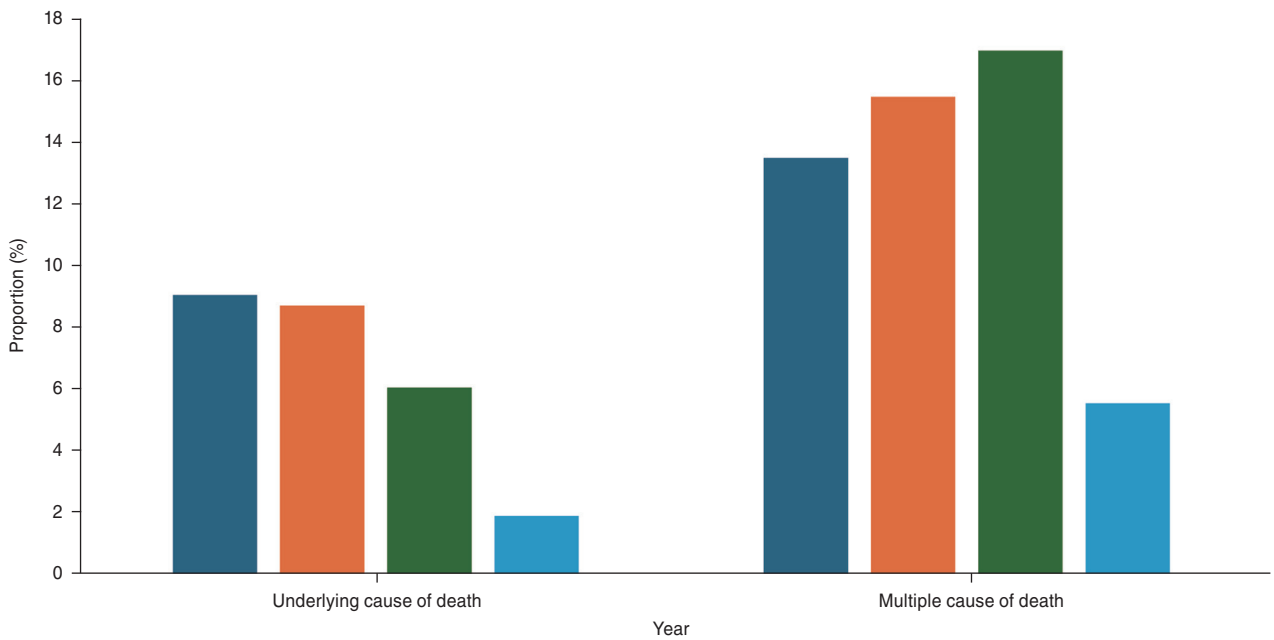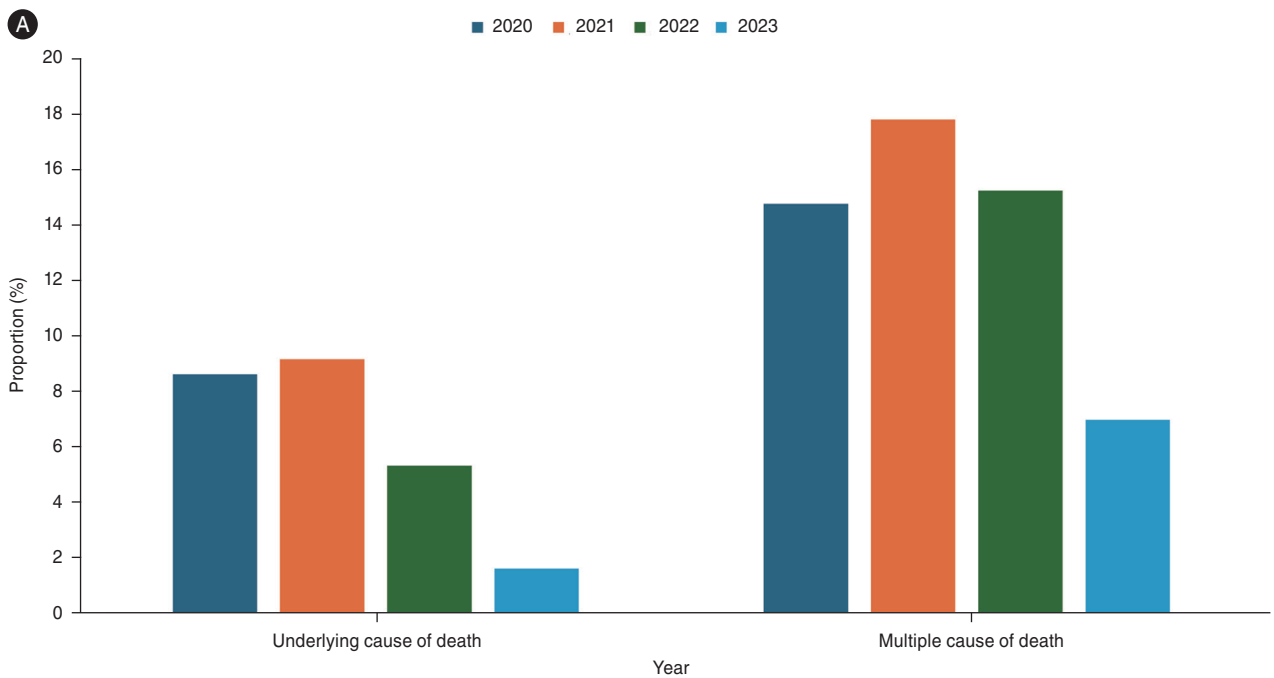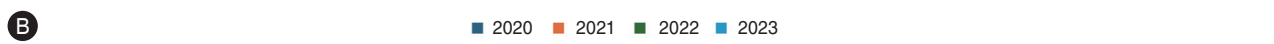

**Supplementary Figure 1.** The Proportion of COVID-19-related mortality as underlying or multiple cause of death among individuals with hepatocellular carcinoma or intrahepatic cholangiocarcinoma in the United States from 2018 to 2023. (A) Hepatocellular carcinoma. (B) Intrahepatic cholangiocarcinoma.
