# Supplementary material for: Burden of mortality from hepatocellular carcinoma and biliary tract cancers by race and ethnicity and sex in US, 2018–2023
Source: PubMed Central journal article supplement — Clin Mol Hepatol. 2024 Jun 24;30(4):756–70. doi: 10.3350/cmh.2024.0318 (PMC11540356; doi:10.3350/cmh.2024.0318), 2024-06-24
Supplement: cmh-2024-0318-Supplementary-Fig-2.pdf [file cmh-2024-0318-Supplementary-Fig-2.pdf]

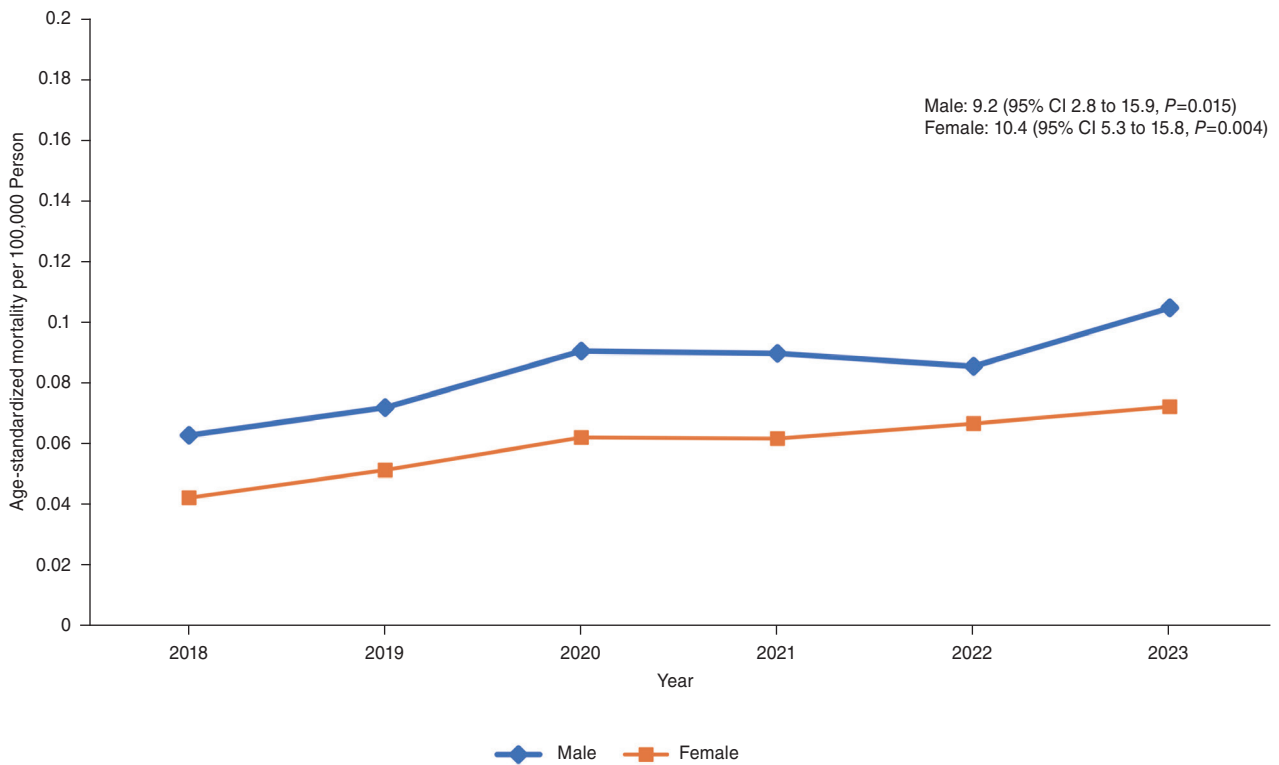

**Supplementary Figure 2.** Age-standardized sex-based mortality for hepatocellular carcinoma due to metabolic dysfunction-associated steatotic liver disease in the United States between 2018 and 2023. CI, confidence interval.
