# Supplementary material for: Burden of mortality from hepatocellular carcinoma and biliary tract cancers by race and ethnicity and sex in US, 2018–2023
Source: PubMed Central journal article supplement — Clin Mol Hepatol. 2024 Jun 24;30(4):756–70. doi: 10.3350/cmh.2024.0318 (PMC11540356; doi:10.3350/cmh.2024.0318), 2024-06-24
Supplement: cmh-2024-0318-Supplementary-Table-1.pdf [file cmh-2024-0318-Supplementary-Table-1.pdf]

**Supplementary Table 1.** Characteristics of deaths in the United States for hepatocellular carcinoma and biliary tract cancers as an underlying cause of death from 2018 to 2023 (total population=18,527,426)

|                                               | Hepatocellular carcinoma | Intrahepatic cholangiocarcinoma | Extrahepatic cholangiocarcinoma | Gallbladder cancer | Ampulla of Vater cancer |
|-----------------------------------------------|--------------------------|---------------------------------|---------------------------------|--------------------|-------------------------|
| Total                                         | 120,932                  | 49,756                          | 5,968                           | 12,935             | 1,833                   |
| Age at death (year)                           |                          |                                 |                                 |                    |                         |
| 25–44                                         | 1,354 (1.12)             | 1,345 (2.70)                    | 111 (1.86)                      | 193 (1.49)         | 25 (1.36)               |
| 45–64                                         | 35,176 (29.09)           | 13,389 (26.91)                  | 1,353 (22.67)                   | 3,006 (23.24)      | 316 (17.24)             |
| 65–                                           | 84,402 (69.79)           | 35,022 (70.39)                  | 4,504 (75.47)                   | 9,736 (75.27)      | 1,492 (81.40)           |
| Sex                                           |                          |                                 |                                 |                    |                         |
| Male                                          | 87,132 (72.05)           | 25,438 (51.13)                  | 3,055 (51.19)                   | 4,255 (32.90)      | 993 (54.17)             |
| Female                                        | 33,800 (27.95)           | 24,318 (48.87)                  | 2,913 (48.81)                   | 8,680 (67.10)      | 840 (45.83)             |
| Race and Ethnicity                            |                          |                                 |                                 |                    |                         |
| Non-Hispanic White                            | 77,368 (63.98)           | 35,539 (71.43)                  | 4,412 (73.93)                   | 7,990 (61.77)      | 1,319 (71.96)           |
| Non-Hispanic Black                            | 16,398 (13.56)           | 5,038 (10.13)                   | 565 (9.47)                      | 2,069 (16.00)      | 147 (8.02)              |
| Non-Hispanic American Indian or Alaska Native | 1,166 (0.96)             | 311 (0.63)                      | 31 (0.52)                       | 102 (0.79)         | -                       |
| Non-Hispanic Asian or Pacific Islander        | 7,239 (5.99)             | 3,015 (6.06)                    | 286 (4.79)                      | 765 (5.91)         | 124 (6.76)              |
| Hispanic                                      | 17,738 (14.67)           | 5,514 (11.08)                   | 644 (10.79)                     | 1,932 (14.94)      | 219 (11.95)             |
